# Supplementary material
Source: PubMed Central journal article supplement (PMC5935549)
Supplement: NIHMS921829-supplement-Supinfo.pdf [file NIHMS921829-supplement-Supinfo.pdf]

## Supporting Information

**Table S1.** Genomes used to design primers

| Strain                            | GenBank assembly accession |
|-----------------------------------|----------------------------|
| <i>Gilliamella apicola</i> wkB7   | GCA_001693435.1            |
| <i>Gilliamella apicola</i> P54G   | GCA_001690735.1            |
| <i>Gilliamella apicola</i> wkB1   | GCA_000599985.1            |
| <i>Gilliamella apicola</i> I20    | GCA_000725175.1            |
| <i>Gilliamella apicola</i> P17    | GCA_000725245.1            |
| <i>Gilliamella apicola</i> M1_2G  | GCA_001690775.1            |
| <i>Gilliamella apicola</i> M6_3G  | GCA_001723875.1            |
| <i>Gilliamella apicola</i> P62G   | GCA_001690755.1            |
| <i>Gilliamella apicola</i> P83G   | GCA_001690175.1            |
| <i>Snodgrassella alvi</i> O02     | GCA_000725195.1            |
| <i>Snodgrassella alvi</i> PEB0178 | MEIW00000000               |
| <i>Snodgrassella alvi</i> O11     | GCA_000725185.1            |
| <i>Snodgrassella alvi</i> wkB2    | GCA_000600005.1            |
| <i>Snodgrassella alvi</i> J21     | GCA_000722505.1            |
| <i>Snodgrassella alvi</i> M1_3S   | MEIX00000000               |

**Table S2.** Gene markers and primers used in this study.

| Species                    | Locus Tag    | Gene name   | Annotation                               | Forward primer       | Reverse Primer        | Amplicon length (bp) |
|----------------------------|--------------|-------------|------------------------------------------|----------------------|-----------------------|----------------------|
| <i>Gilliamella apicola</i> | GAPWK_0415   | <i>rimM</i> | 16S rRNA processing protein RimM         | GGCATTCTGGTGGCTCAG   | ACGTTCTGTGCTCCAAAYGC  | 393                  |
|                            | GAPWK_0528   | <i>pflA</i> | Pyruvate formate-lyase activating enzyme | GMTTTAAAGCWGGGCGWGAA | ACRTAGCGGATCCAAGTYCGT | 379                  |
| <i>Snodgrassella alvi</i>  | SALWKB2_1196 | <i>guaA</i> | GMP synthase                             | GACATACACCAAGCTGTCCG | CATTTGCGCTTCYTGATRCG  | 346                  |
|                            | SALWKB2_0399 | <i>gluS</i> | Glutaminyl-tRNA synthetase               | GGATGARTATGTGCGCKGAT | GCATCGAAATCGCATGCGT   | 472                  |

**Table S3.** Associations between allelic variation of *S. alvi* and *G. apicola* and the relative and absolute frequencies of the different community members in the bee gut.

|                 | Relative abundance   |                       |             |                       |                    |                       |              |                       |
|-----------------|----------------------|-----------------------|-------------|-----------------------|--------------------|-----------------------|--------------|-----------------------|
|                 | <i>Snodgrassella</i> |                       |             |                       | <i>Gilliamella</i> |                       |              |                       |
|                 | <i>guaA</i>          |                       | <i>gluS</i> |                       | <i>pflA</i>        |                       | <i>rimM</i>  |                       |
|                 | Rho                  | <i>p</i> .value (adj) | Rho         | <i>p</i> .value (adj) | Rho                | <i>p</i> .value (adj) | Rho          | <i>p</i> .value (adj) |
| Alpha2_1        | -0.39                | 0.14                  | -0.21       | 1                     | 0.05               | 1                     | 0.11         | 1                     |
| Bartonella      | <b>0.40</b>          | <b>0.087</b>          | 0.39        | 0.18                  | <b>0.48</b>        | <b>0.0008</b>         | <b>0.48</b>  | <b>0.0008</b>         |
| Bifidobacterium | -0.10                | 1                     | -0.26       | 1                     | 0.12               | 1                     | 0.10         | 1                     |
| Firm_4          | 0.18                 | 1                     | 0.18        | 1                     | 0.18               | 1                     | 0.19         | 1                     |
| Firm_5          | -0.05                | 1                     | -0.11       | 1                     | -0.13              | 1                     | 0.03         | 1                     |
| Frischella      | 0.07                 | 1                     | -0.06       | 1                     | -0.30              | 0.72                  | <b>-0.42</b> | <b>0.014</b>          |
| Fructobacillus  | 0.14                 | 1                     | 0.19        | 1                     | 0.28               | 1                     | 0.36         | 0.13                  |
| Gluconobacter   | 0.18                 | 1                     | 0.13        | 1                     | 0.17               | 1                     | 0.15         | 1                     |
| Klebsiella      | -0.15                | 1                     | -0.10       | 1                     | -0.10              | 1                     | -0.16        | 1                     |
| L_kunkeei       | -0.34                | 0.58                  | -0.25       | 1                     | 0.23               | 1                     | 0.21         | 1                     |
| Serratia        | 0.03                 | 1                     | 0.11        | 1                     | 0.16               | 1                     | 0.25         | 1                     |
| Zymobacter      | 0.13                 | 1                     | 0.23        | 1                     | 0.09               | 1                     | 0.09         | 1                     |
|                 | Absolute abundance   |                       |             |                       |                    |                       |              |                       |
|                 | <i>Snodgrassella</i> |                       |             |                       | <i>Gilliamella</i> |                       |              |                       |
|                 | <i>guaA</i>          |                       | <i>gluS</i> |                       | <i>pflA</i>        |                       | <i>rimM</i>  |                       |
|                 | Rho                  | <i>p</i> .value (adj) | Rho         | <i>p</i> .value (adj) | Rho                | <i>p</i> .value (adj) | Rho          | <i>p</i> .value (adj) |
| Alpha2_1        | 0.07                 | 1                     | 0.15        | 1                     | 0.26               | 1                     | 0.28         | 1                     |
| Bartonella      | 0.22                 | 1                     | 0.38        | 0.29                  | <b>0.49</b>        | <b>0.0005</b>         | <b>0.49</b>  | <b>0.0004</b>         |
| Bifidobacterium | 0.10                 | 1                     | 0.25        | 1                     | <b>0.40</b>        | <b>0.030</b>          | <b>0.40</b>  | <b>0.031</b>          |
| Firm_4          | 0.10                 | 1                     | 0.27        | 1                     | <b>0.39</b>        | <b>0.046</b>          | 0.31         | 0.65                  |
| Firm_5          | 0.06                 | 1                     | 0.20        | 1                     | 0.23               | 1                     | 0.29         | 1                     |
| Frischella      | 0.05                 | 1                     | 0.24        | 1                     | 0.24               | 1                     | 0.26         | 1                     |
| Fructobacillus  | 0.07                 | 1                     | 0.23        | 1                     | 0.17               | 1                     | 0.10         | 1                     |
| Gluconobacter   | -0.10                | 1                     | -0.26       | 1                     | 0.12               | 1                     | 0.09         | 1                     |
| Klebsiella      | -0.07                | 1                     | -0.02       | 1                     | 0.01               | 1                     | 0.18         | 1                     |
| L_kunkeei       | -0.17                | 1                     | -0.08       | 1                     | -0.08              | 1                     | -0.11        | 1                     |
| Serratia        | -0.22                | 1                     | -0.04       | 1                     | 0.34               | 0.27                  | 0.30         | 0.75                  |
| Zymobacter      | -0.01                | 1                     | 0.24        | 1                     | 0.37               | 0.081                 | 0.32         | 0.46                  |

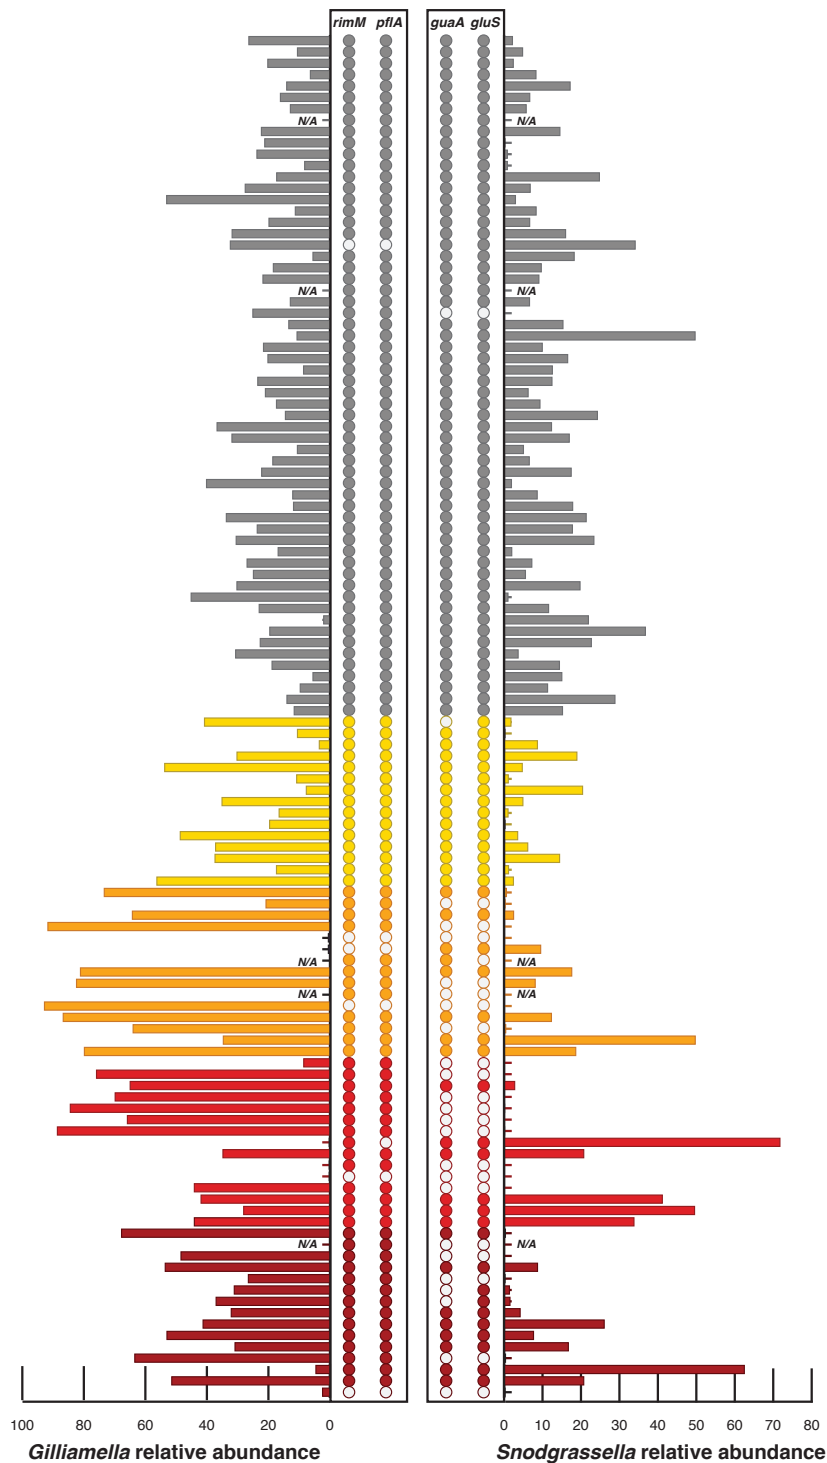

**Figure S1.** Honeybee samples amplified in this study. Bar graphs show the relative abundance of *G. apicola* (left) and *S. alvi* (right) reported by Raymann et al. 2017 (based on 16S rRNA gene sequencing). Samples that did not have relative abundance information are marked by *N/A*. Filled circles represent samples that we successfully amplified using our designed primers for RimM, PflA, GMP, and GluS. All control bees are shown in gray bars and circles. Treated bees are colored by day (Day 0= yellow, Day 3= orange, Day 5= light red, Day 7= dark red). Samples for which no relative abundance data was available are marked by *N/A*.

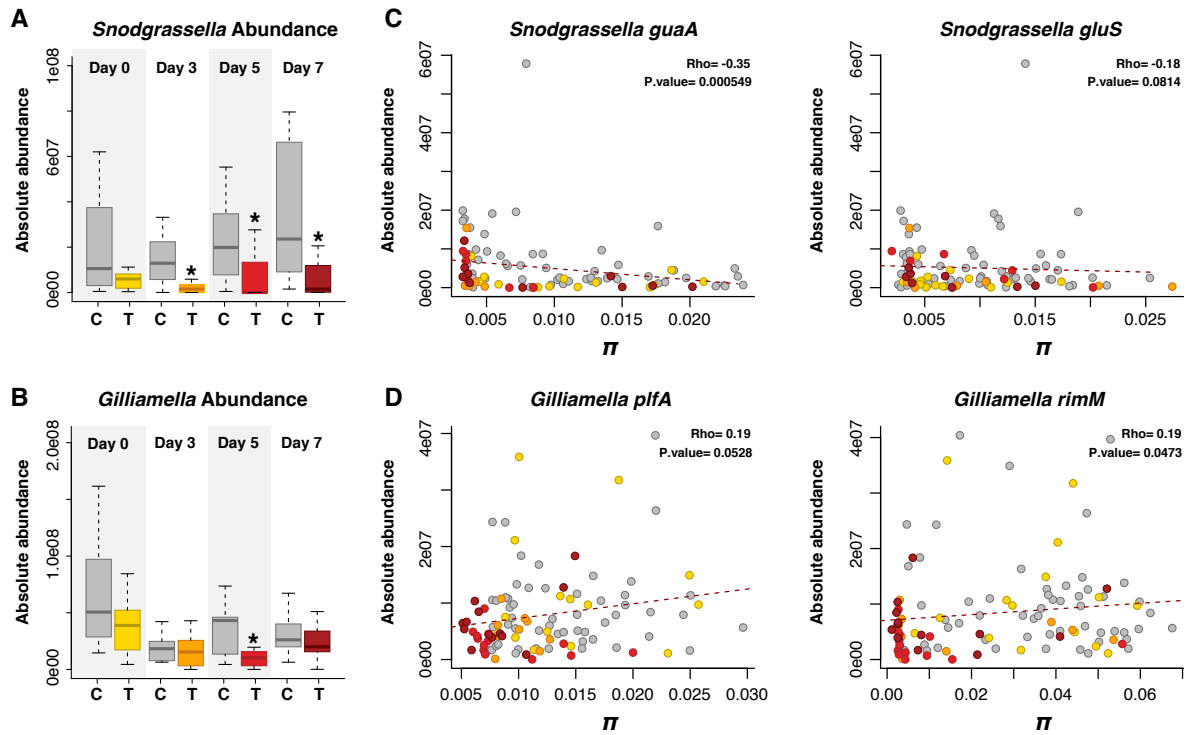

**Figure S2.** Correlation between allelic diversity and absolute abundance. Absolute abundance of *S. alvi* (a) and *G. apicola* (b) in control (C) and treatment (T) bees at Days 0, 3, 5, and 7 post-treatment taken from Raymann et al. 2017. Box-and-whisker plots show high, low, and median values, with lower and upper edges of each box denoting first and third quartiles, respectively. The central vertical lines represent the data range, with a maximal distance of 1.5 interquartile ranges. \* =  $P < 0.05$ , Wilcoxon test. Spearman Correlation between absolute abundance and  $\pi$  (c-d). All control bees are shown in gray dots. Treated bees are colored by day as in a-b.

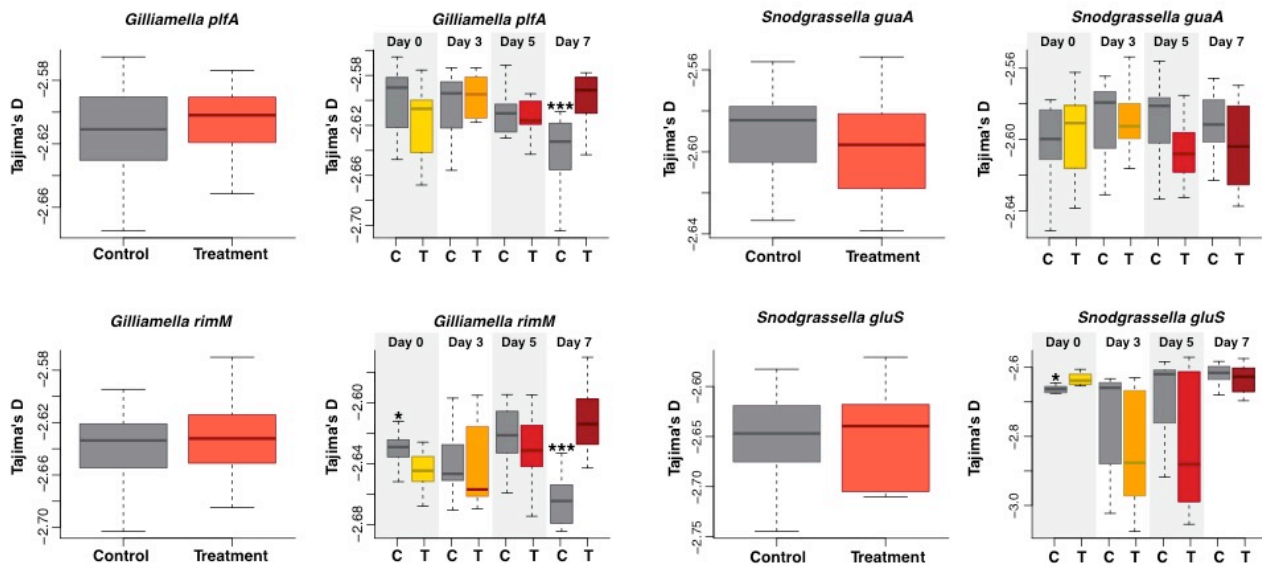

**Figure S3.** Impact of antibiotic treatment on allele frequency. Tajima's  $D$  for each gene marker for all control and treated bees as well as for control and treated bees at each day post-treatment (Days 0, 3, 5, and 7). Box-and-whisker plots show high, low, and median values, with lower and upper edges of each box denoting first and third quartiles, respectively. The central vertical lines represent the data range, with a maximal distance of 1.5 interquartile ranges. \* =  $P < 0.05$ , \*\*\* =  $P < 0.0001$ , Wilcoxon test.

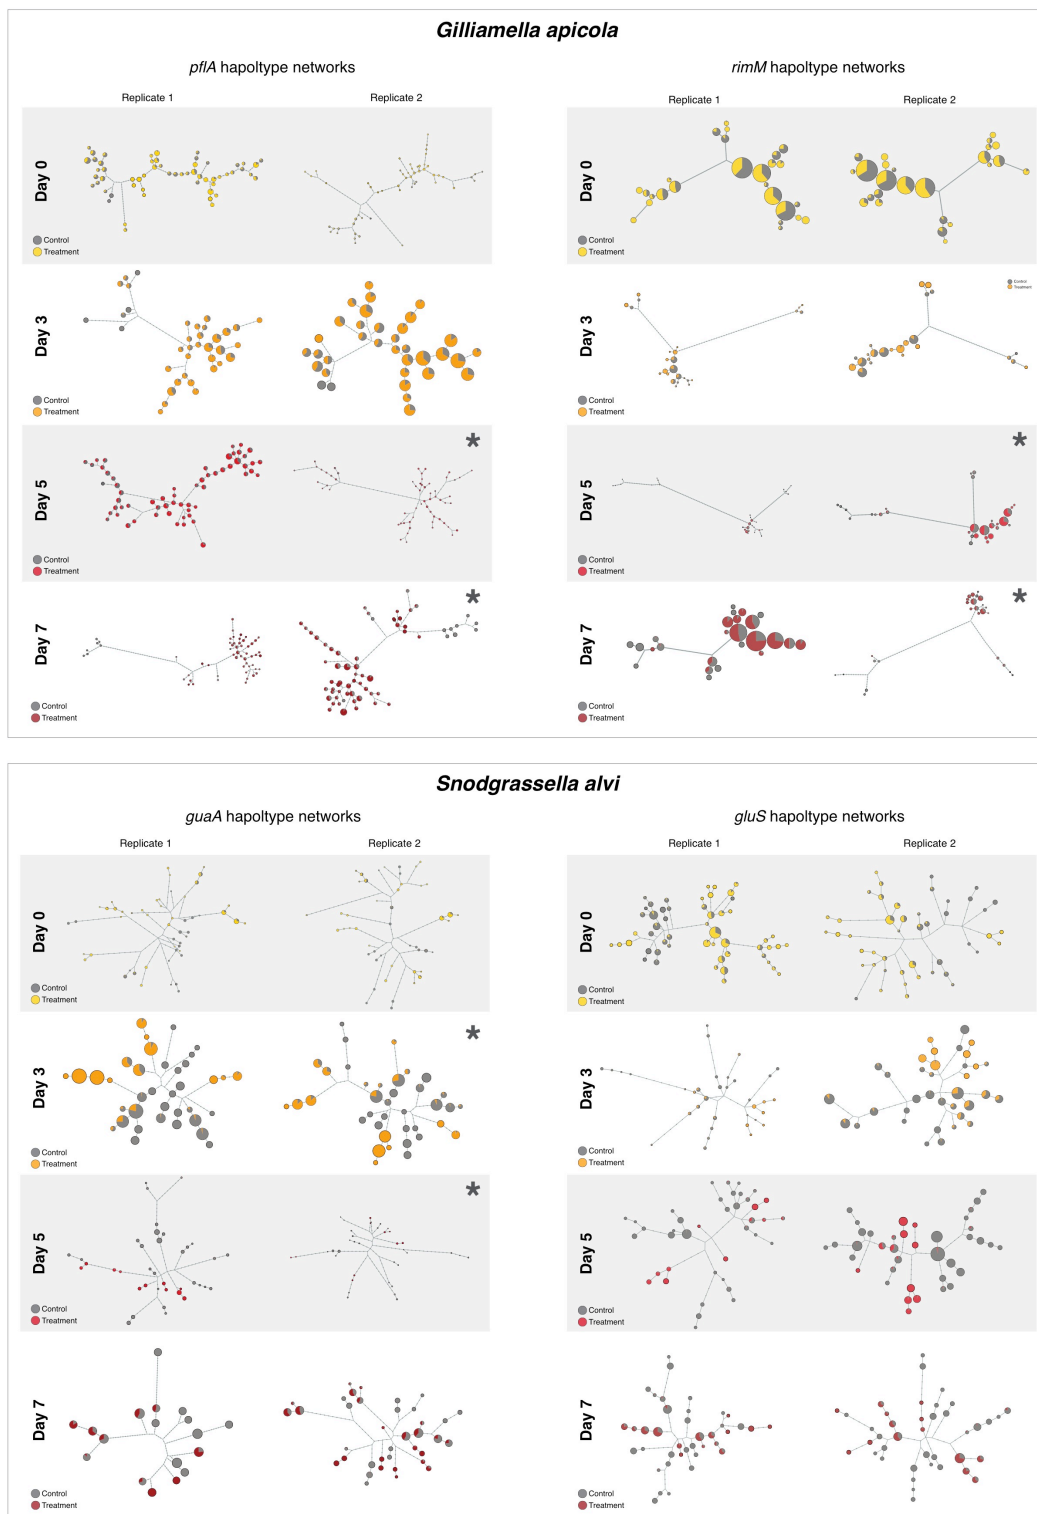

**Figure S4.** Haplotype networks of *G. apicola* and *S. alvi* based on the four marker genes. Haplotype networks were built for each marker gene and for each day independently. For each graph, 100 reads were randomly sampled per bee twice (i.e. sampling Replicates 1 and 2). Circles represent haplotypes and circle size is proportional to the number of reads. Haplotypes supported by fewer than 10 reads were collapsed into small light gray circles. Within circles, dark gray areas indicate haplotypes found in control bees and colored areas represent haplotypes found in treated bees. Edges between haplotypes indicate substitutions (unit= 1 substitution). Asterisks indicate significant differences observed based on nucleotide diversity in Figure 1.

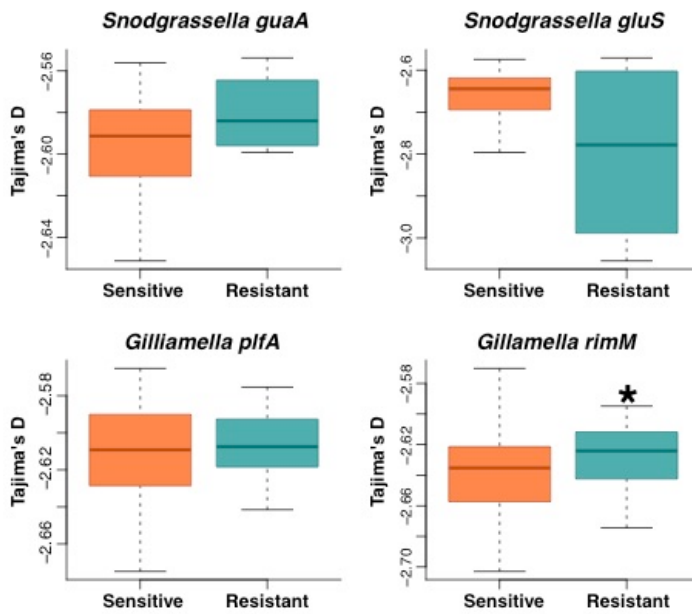

**Figure S5.** Impact of antibiotic treatment on allele frequency in “sensitive” versus “resistant” bees. Tajima’s  $D$  for each gene marker for “sensitive” and “resistant” bees. Box-and-whisker plots show high, low, and median values, with lower and upper edges of each box denoting first and third quartiles, respectively. The central vertical lines represent the data range, with a maximal distance of 1.5 interquartile ranges. \* =  $P < 0.05$ , Wilcoxon test.

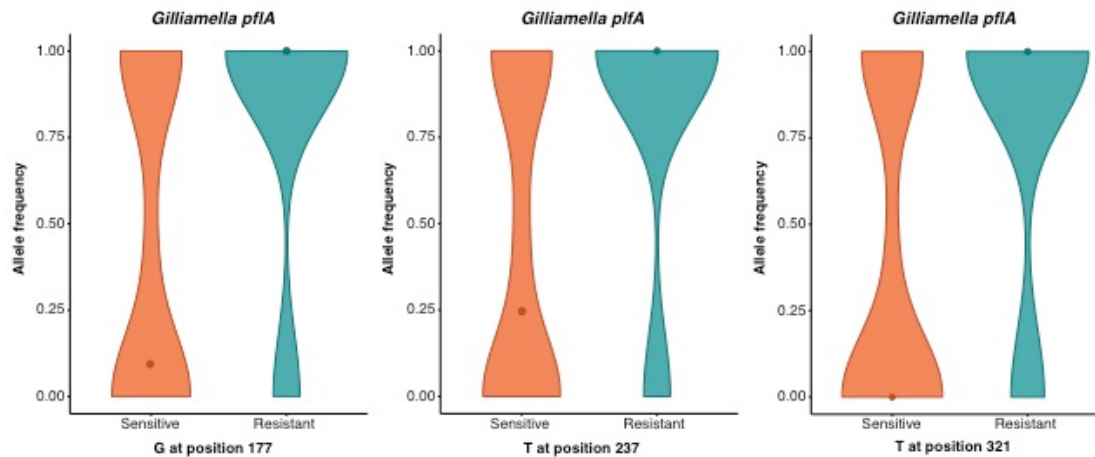

**Figure S6.** Shifts in individual allele frequencies in resistant populations relative to sensitive populations. Violin plots showing the three alleles that significantly ( $P < 0.05$ , Wilcoxon test and  $t$ -test with Bonferroni correction) increased in frequency in resistant bees.
